# Supplementary material for: Thermal Remediation of Soil Contaminated with Polycyclic Aromatic Hydrocarbons: Pollutant Removal Process and Influence on Soil Functionality
Source: MDPI journal article supplement (doi:10.3390/toxics10080474), 2022-08-16
Supplement: s1 [file s1]

# Supplementary Materials: Thermal Remediation of Soil Contaminated with Polycyclic Aromatic Hydrocarbons: Pollutant Removal Process and Influence on Soil Functionality

Chenfeng Liu, Huading Shi, Chen Wang, Yang Fei and Ziyu Han \*

## 1. Detection Methods

**Soil pH:** 10 g through 1 mm meshes soil was prepared in 25 mL beaker, 10 mL 0.01 mol·L<sup>-1</sup>CaCl<sub>2</sub> solution was added and mixed fully with soil. After standing 30 min, a pH meter (PHSJ-4A, Shanghai Leici, China) was used for pH value detection.

**Soil CEC:** 2 g through 1 mm meshes, soil was prepared in 25 mL plastic bottle, 20 mL ammonium oxalate-ammonium chloride solution as added, then lid covered and oscillated on thermostatic oscillator for 15 min at rate of 170 r·min<sup>-1</sup>, then 10 mL sample was prepared in Kjeldahl bottle, settled on azotometer (SR-04D, Sheyanyiqi, China) and recorded the volume of hydrochloric acid.

**Soil PAHs:** The PAH content of the soil was measured using an ultrasonic method and detected by a gas chromatograph-mass spectrometer (7000B, Agilent Technologies, Santa Clara, CA, USA). The extraction solution was n-hexane and tetrachloromethane, and the detection temperature was 280 °C.

## 2. Supplementary data

Results of changing of pH and CEC though the thermal treatment were showed as following table.

**Table S1.** Changing of pH and CEC though the thermal treatment.

| Soil          | pH  | CEC (cmol·kg <sup>-1</sup> ) |
|---------------|-----|------------------------------|
| Original soil | 7.7 | 3.05                         |
| 50°C          | 7.4 | 2.91                         |
| 100°C         | 7.5 | 3.02                         |
| 200°C         | 8.0 | 3.02                         |
| 400°C         | 8.4 | 3.05                         |
| 800°C         | 8.5 | 3.05                         |
